# Supplementary material for: Finding correct protein–protein docking models using ProQDock
Source: PubMed Central journal article supplement — Bioinformatics. 2016 Jun 11;32(12):i262–70. doi: 10.1093/bioinformatics/btw257 (PMC4908341; doi:10.1093/bioinformatics/btw257), 2016-06-11
Supplement: supp_btw257_Wallner.87.sup.1.pdf [file supp_btw257_Wallner.87.sup.1.pdf]

### Distribution of features for correct/incorrect models(MOAL)

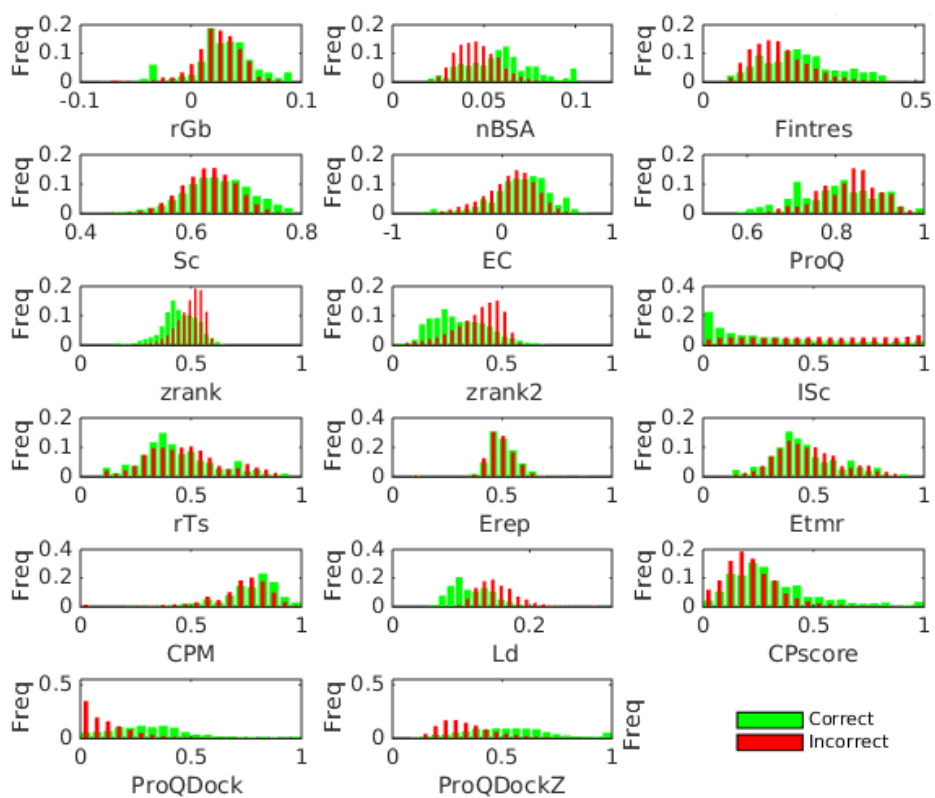

**Fig. S1.** Distribution of training features on the MOAL set for correct (green) and incorrect (red) models. The features that are outside the -1,1 range are scaled using logistic scaling (see Methods) to put them in the range 0-1. For the methods that are energy terms, zrank, zrank2, ISc, rTs, Erep, and Etmr lower scores are better, for the others higher are better.

### Distribution of features for correct/incorrect models (CAPRI)

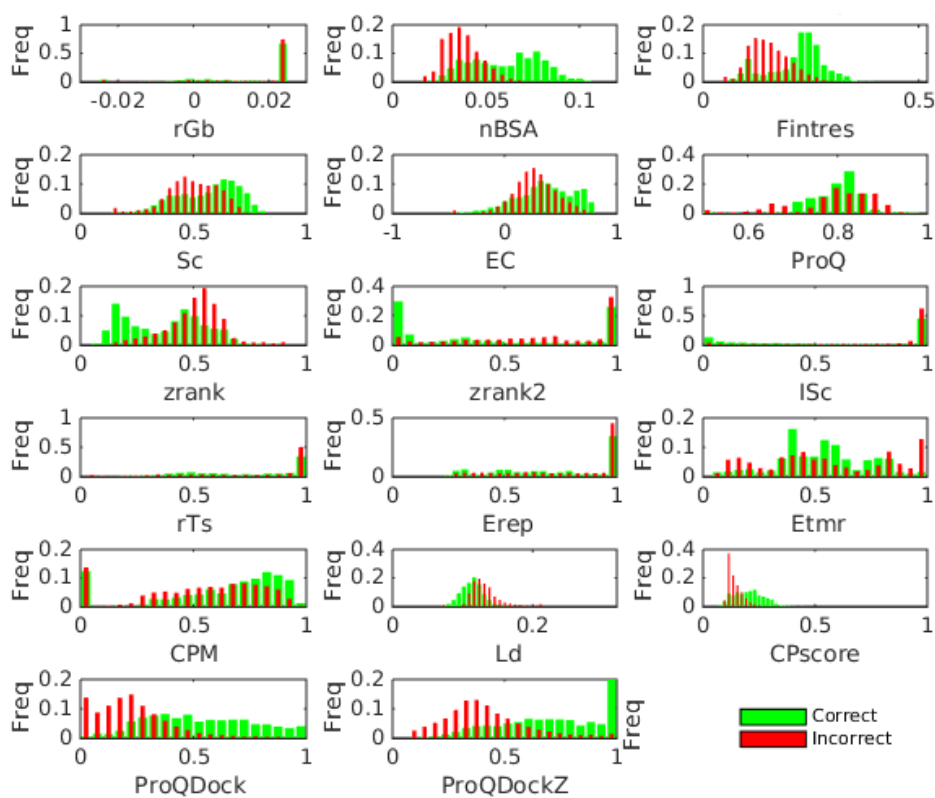

**Fig. S2.** Distribution of training features on the CAPRI set for correct (green) and incorrect (red) models. The features that are outside the -1,1 range are scaled using logistic scaling (see Methods) to put them in the range 0-1. For the methods that are energy terms, zrank, zrank2, ISc, rTs, Erep, and Etmr lower scores are better, for the others higher are better.
